# Supplementary material
Source: HighWire-hosted journal article supplement (https://bmjopen.bmj.com/content/14/6/e084719)
Supplement: inline-supplementary-material-1 [file inline-supplementary-material-1.pdf]

Supplementary Material

Appendix A. List of current GS management and delivery team, investigators and members of the Scientific Steering Committee.

|                                                                                                     |
|-----------------------------------------------------------------------------------------------------|
| <b>GS Scientific Steering Committee</b>                                                             |
| Professor Dame Anna F Dominiczak (University of Glasgow & Chief Scientist Office, Scotland) – Chair |
| Professor Cathie Sudlow (University of Edinburgh) – GS Director                                     |
| Professor Heather Whalley (University of Edinburgh) – GS Chief Scientist                            |
| Professor Julie Brittenden (University of Glasgow)                                                  |
| Dr Christian Cole (University of Dundee)                                                            |
| Professor Riccardo Marioni (University of Edinburgh)                                                |
| Professor Zosia Miedzybrodzka (University of Aberdeen)                                              |
| Professor Sandosh Padmanabhan (University of Glasgow)                                               |
| Professor Blair Smith (University of Dundee)                                                        |
| Katie Wilde (University of Aberdeen)                                                                |
| <b>GS Scientific Leadership Team</b>                                                                |
| Professor Cathie Sudlow – GS Director and Principal Investigator (PI)                               |
| Professor David Porteous - Co-Investigator (Former Director and PI)                                 |
| Professor Andrew McIntosh- Co-Investigator                                                          |
| Professor Riccardo Marioni- Co-Investigator                                                         |
| Professor Caroline Hayward- Co-Investigator                                                         |
| Professor Heather Whalley – GS Chief Scientist and Co-Investigator                                  |
| <b>GS Management and Delivery Team</b>                                                              |
| Professor Cathie Sudlow (University of Edinburgh) – Director                                        |
| Archie Campbell (University of Edinburgh) - Chief Technology Officer                                |
| Robin Flaig (University of Edinburgh) - Chief Operations Officer                                    |
| Dr Daniel McCartney (University of Edinburgh) - Senior Bioinformatics Analyst                       |
| Professor Heather Whalley (University of Edinburgh) - Chief Scientist                               |
| Fiona Clark (University of Edinburgh) – Partnership Coordinator                                     |
| Elly Darrah (University of Edinburgh) – Administrator                                               |
| Liz Kirby (University of Edinburgh) - Research Support Officer                                      |
| Hannah Milbourn (University of Edinburgh) - Health Data Scientist                                   |
| Anne Richmond (University of Edinburgh) - Bioinformatics Analyst                                    |
| Sarah Robertson (University of Edinburgh) - Young Person Engagement & Recruitment Co-ordinator      |
| Rosie Tatham (University of Edinburgh) – Administrator                                              |
| Alex Wood (University of Edinburgh) - Data Analyst / Developer                                      |
| Dr Zhuoni Xiao (University of Edinburgh) – Research Fellow                                          |
| Leah Young (University of Edinburgh) - Research Support Officer                                     |

Appendix B. Full list of available linked NHS datasets and descriptions.

<sup>a</sup> Scottish National healthcare data is collected as a series of Scottish Morbidity Records (SMR).

| Linked Dataset                                            | Coding        | Date Range | N      | Description                                                                                                                                  |
|-----------------------------------------------------------|---------------|------------|--------|----------------------------------------------------------------------------------------------------------------------------------------------|
| Scottish Morbidity Records (SMR)                          |               |            |        |                                                                                                                                              |
| Outpatient Attendance (SMR00) <sup>a</sup>                | None          | 1996-2020  | 21,270 | Outpatient attendance information excluding A&E and genitourinary medicine.                                                                  |
| General/Acute Inpatient and Day Case (SMR01) <sup>a</sup> | ICD9/ICD10    | 1980-2022  | 19,611 | Acute inpatient and daycase hospital admissions: disease and procedure codes. Scotland-wide, around 750 000 admissions per annum since 1981. |
| Maternity Inpatient and Day Case (SMR02) <sup>a</sup>     | ICD9/ICD10    | 1975-2020  | 8,238  | Pregnancies and births: disease and procedure codes. Scotland-wide, around 58,000 deliveries per annum since 1975.                           |
| Mental Health Inpatient and Day Case (SMR04) <sup>a</sup> | ICD9/ICD10    | 1980-2020  | 578    | Psychiatric hospital discharges and diagnostic information.                                                                                  |
| Scottish Cancer Registry (SMR06) <sup>a</sup>             | ICD10         | 1996-2020  | 3,606  | Personal, demographic, and diagnostic information on all new cases of cancer.                                                                |
| Scottish Birth Record (SMR11) <sup>a</sup>                | ICD9/ICD10    | 1975-1992  | 3,246  | Linked maternity, neonatal and stillbirth and infant death records from 1975, with records pertaining to mother and baby held together.      |
| Primary Care                                              |               |            |        |                                                                                                                                              |
| General Practice (GP)                                     | ReadV2        | 1980-2020  | 19,675 | GP primary care attendances.                                                                                                                 |
| GP Out-of-Hours Data                                      | ReadV2        | 2014-2022  | 8,533  | Data on patients seen by GP Out of Hours (OOH) services across Scotland since 2014.                                                          |
| NHS24                                                     | Outcome Codes | 2011-2022  | 12,326 | Records of telehealth and telecare services provided through nhs24.scot website and NHS 24 111 phone service.                                |
| Accident and Emergency (A&E)                              | ICD10         | 2007-2020  | 15,248 | Patient attendance information at Emergency Department (EDs), Minor Injuries Units (MIUs) and community hospital A&Es across NHS Scotland.   |
| Other Datasets                                            |               |            |        |                                                                                                                                              |

|                                                |        |           |        |                                                                                                                                                                             |
|------------------------------------------------|--------|-----------|--------|-----------------------------------------------------------------------------------------------------------------------------------------------------------------------------|
| Routine laboratory testing                     | ReadV2 | 1997-2018 | 19,089 | Laboratory test results from primary and secondary care provided by the Scottish Care Information (SCI) Store.                                                              |
| ICU Daily Data (SICSAG)                        | None   | 2019-2022 | 361    | Scottish Intensive Care Society Audit Group (SICSAG) national database of patients admitted to adult Critical Care Units in Scotland since 1995.                            |
| ICU Episode Data (SICSAG)                      | None   | 2019-2022 | 361    |                                                                                                                                                                             |
| National Records of Scotland (NRS) Deaths Data | ICD10  | 2007-2022 | 1,659  | All deaths occurring in Scotland. NRS Death Records are linked with NHS Scotland Scottish Morbidity Database.                                                               |
| Diabetes Registry (SCI-DC)                     | None   | 2019      | 1,423  | The Scottish Care Information – Diabetes Collaboration (SCI-DC), established in 2002. Integrated electronic patient record for individuals with diabetes.                   |
| Pre-2009 Dispensing Data (PIS)                 | BNF    | 1989-2009 | 12,981 | The Prescribing Information System (PIS) covers all NHS prescriptions prescribed, dispensed and reimbursed within the community setting. Pre-2009 data is poorly completed. |
| Post-2009 Dispensing Data (PIS)                | BNF    | 2009-2020 | 21,486 |                                                                                                                                                                             |
| COVID-19 Vaccinations                          | None   | 2020-2022 | 19,128 | Scottish Covid-19 vaccination data contains COVID-19 vaccination events since December 2020.                                                                                |
| Testing (ECOSS)                                | None   | 2020-2022 | 16,537 | Electronic Communication of Surveillance in Scotland (ECOSS) system surveillance data on COVID-19 infections reported from diagnostics and reference laboratories.          |
| Dental (MIDAS)                                 | SDR    | 1994-2019 | 19,870 | Management Information & Dental Accounting System (MIDAS), the payment system for GDS dentists, information on NHS dentist appointments.                                    |
| Scottish Drug Misuse Database                  | None   | 2001-2016 | 76     | Scottish Drug Misuse Database (SDMD), attendances at broad range of services.                                                                                               |

**Appendix C. Secondary Care ICD-10 codes used to investigate cohort morbidities. Codes were derived from Gadd et al [43] using CALIBER code lists. ICD-10 codes are used for all records after 1994 when they replaced the use of ICD-9 codes. Codes were used to query SMR01 (General/Acute Inpatient and Day Case), SMR06 (Scottish Cancer Registry) and NRS death registration datasets.**

| Secondary Care ICD-10 Codes                  |                                                                                       |
|----------------------------------------------|---------------------------------------------------------------------------------------|
| Code                                         | Description                                                                           |
| <b>Asthma</b>                                |                                                                                       |
| J45                                          | Asthma                                                                                |
| J46                                          | Status asthmaticus                                                                    |
| <b>Bowel cancer</b>                          |                                                                                       |
| C18                                          | Malignant neoplasm of colon                                                           |
| <b>Breast cancer</b>                         |                                                                                       |
| C50                                          | Malignant neoplasm of breast                                                          |
| <b>Chronic obstructive pulmonary disease</b> |                                                                                       |
| J40                                          | Bronchitis, not specified as acute or chronic                                         |
| J41                                          | Simple and mucopurulent chronic bronchitis                                            |
| J42                                          | Unspecified chronic bronchitis                                                        |
| J43                                          | Emphysema                                                                             |
| J44                                          | Other chronic obstructive pulmonary disease                                           |
| <b>Dementia</b>                              |                                                                                       |
| F00                                          | Dementia in Alzheimer’s disease                                                       |
| F01                                          | Vascular dementia                                                                     |
| F03                                          | Unspecified dementia                                                                  |
| F051                                         | Delirium superimposed on dementia                                                     |
| G30                                          | Alzheimer's disease                                                                   |
| <b>Depression</b>                            |                                                                                       |
| F32                                          | Major depressive disorder                                                             |
| F33                                          | Major depressive disorder                                                             |
| <b>Diabetes</b>                              |                                                                                       |
| E10                                          | Type 1 diabetes mellitus                                                              |
| E11                                          | Type 2 diabetes mellitus                                                              |
| E12                                          | Malnutrition-related diabetes mellitus                                                |
| E13                                          | Other specified diabetes mellitus                                                     |
| E14                                          | Unspecified diabetes mellitus                                                         |
| H360                                         | Diabetic retinopathy                                                                  |
| O243                                         | Diabetes mellitus in pregnancy: Pre-existing diabetes mellitus, unspecified           |
| N083                                         | Glomerular disorders in diabetes mellitus                                             |
| H280                                         | Diabetic cataract                                                                     |
| O242                                         | Diabetes mellitus in pregnancy: Pre-existing malnutrition-related diabetes mellitus   |
| M142                                         | Diabetic arthropathy                                                                  |
| G632                                         | Diabetic polyneuropathy                                                               |
| O240                                         | Diabetes mellitus in pregnancy: Pre-existing diabetes mellitus, insulin-dependent     |
| O241                                         | Diabetes mellitus in pregnancy: Pre-existing diabetes mellitus, non-insulin-dependent |
| G590                                         | Diabetic mononeuropathy                                                               |
| <b>Hypertension</b>                          |                                                                                       |
| I10                                          | Essential (primary) hypertension                                                      |

|                                |                                                                     |
|--------------------------------|---------------------------------------------------------------------|
| I11                            | Hypertensive heart disease                                          |
| I12                            | Hypertensive renal disease                                          |
| I13                            | Hypertensive heart and renal disease                                |
| I15                            | Secondary hypertension                                              |
| <b>Ischaemic heart disease</b> |                                                                     |
| I20                            | Angina pectoris                                                     |
| I21                            | Acute myocardial infarction                                         |
| I22                            | Subsequent myocardial infarction                                    |
| I23                            | Certain current complications following acute myocardial infarction |
| I24                            | Other acute ischaemic heart diseases                                |
| I25                            | Chronic ischaemic heart disease                                     |
| <b>Lung Cancer</b>             |                                                                     |
| C34                            | Malignant neoplasm of bronchus and lung                             |
| <b>Osteoarthritis</b>          |                                                                     |
| M15                            | Polyarthrosis                                                       |
| M16                            | Coxarthrosis [arthrosis of hip]                                     |
| M17                            | Gonarthrosis [arthrosis of knee]                                    |
| M18                            | Arthrosis of first carpometacarpal joint                            |
| M19                            | Other arthrosis                                                     |
| <b>Prostate cancer</b>         |                                                                     |
| C61                            | Malignant neoplasm of prostate                                      |
| <b>Rheumatoid arthritis</b>    |                                                                     |
| M05                            | Seropositive rheumatoid arthritis                                   |
| M06                            | Other rheumatoid arthritis                                          |
| J99.0                          | Rheumatoid lung disease                                             |
| <b>Stroke</b>                  |                                                                     |
| I63                            | Cerebral infarction                                                 |
| I64                            | Stroke, not specified as haemorrhage or infarction                  |
| G46.7                          | Other lacunar syndromes                                             |
| G46.6                          | Pure sensory lacunar syndrome                                       |
| G46.5                          | Pure motor lacunar syndrome                                         |
| G46.3                          | Brain stem stroke syndrome                                          |
| G46.4                          | Cerebellar stroke syndrome                                          |
| I69.4                          | Sequelae of stroke, not specified as haemorrhage or infarction      |
| G46.8                          | Other vascular syndromes of brain in cerebrovascular diseases       |
| <b>COVID-19</b>                |                                                                     |
| U071                           | COVID-19, virus identified                                          |

**Appendix D. Secondary Care ICD-9 Codes used to investigate cohort morbidities. ICD-9 codes were used for records up to 1994 when they were replaced with ICD-10. Codes were used to query SMR01 (General/Acute Inpatient and Day Case), SMR06 (Scottish Cancer Registry) and NRS death records datasets.**

| Secondary Care ICD-9 Codes                   |                                                             |
|----------------------------------------------|-------------------------------------------------------------|
| Code                                         | Description                                                 |
| <b>Asthma</b>                                |                                                             |
| 493                                          | Asthma                                                      |
| <b>Bowel cancer</b>                          |                                                             |
| 153                                          | Malignant neoplasm of colon                                 |
| 154                                          | Malignant neoplasm of rectum rectosigmoid junction and anus |
| <b>Breast cancer</b>                         |                                                             |
| 174                                          | Malignant neoplasm of female breast                         |
| <b>chronic obstructive pulmonary disease</b> |                                                             |
| 490                                          | Bronchitis, not specified as acute or chronic               |
| 491                                          | Chronic bronchitis                                          |
| 492                                          | Emphysema                                                   |
| 496                                          | Chronic airway obstruction, not elsewhere classified        |
| <b>Dementia</b>                              |                                                             |
| 290                                          | Dementias                                                   |
| 2912                                         | Alcohol-induced persisting dementia                         |
| 2941                                         | Dementia in conditions classified elsewhere                 |
| 331                                          | Other cerebral degenerations                                |
| <b>Depression</b>                            |                                                             |
| 2962                                         | Major depressive disorder single episode                    |
| 2963                                         | Major depressive disorder recurrent episode                 |
| 311                                          | Depressive disorder not elsewhere classified                |
| <b>Diabetes</b>                              |                                                             |
| 250                                          | Diabetes mellitus                                           |
| 249                                          | Secondary diabetes mellitus                                 |
| <b>Hypertension</b>                          |                                                             |
| 401                                          | Essential hypertension                                      |
| 402                                          | Hypertensive heart disease                                  |
| 403                                          | Hypertensive renal disease                                  |
| 404                                          | Hypertensive heart and renal disease                        |
| 405                                          | Secondary hypertension                                      |
| <b>Ischaemic heart disease</b>               |                                                             |
| 410                                          | Acute myocardial infarction                                 |
| 411                                          | Other acute and subacute forms of ischemic heart disease    |
| 412                                          | Old myocardial infarction                                   |
| 413                                          | Angina pectoris                                             |
| 414                                          | Other forms of chronic ischemic heart disease               |
| <b>Lung cancer</b>                           |                                                             |
| 162                                          | Malignant neoplasm of trachea bronchus and lung             |
| <b>Osteoarthritis</b>                        |                                                             |
| 715                                          | Osteoarthrosis and allied disorders                         |
| <b>Prostate cancer</b>                       |                                                             |

|                      |                                                               |
|----------------------|---------------------------------------------------------------|
| 185                  | Malignant neoplasm of prostate                                |
| Rheumatoid arthritis |                                                               |
| 714                  | Rheumatoid arthritis and other inflammatory polyarthropathies |
| Stroke               |                                                               |
| 430                  | Subarachnoid haemorrhage                                      |
| 431                  | Intracerebral haemorrhage                                     |
| 433                  | Occlusion and stenosis of precerebral arteries                |
| 434                  | Occlusion of cerebral arteries                                |

**Appendix E. Primary Care ReadCode v2 Codes used to investigate cohort morbidities. Codes were derived from Gadd et al [43] using CALIBER code lists.**

| Primary Care ReadCode v2 Codes |                                                          |
|--------------------------------|----------------------------------------------------------|
| Code                           | Description                                              |
| <b>Asthma</b>                  |                                                          |
| 14B4.                          | H/O: asthma                                              |
| 173A.                          | Exercise induced asthma                                  |
| 173c.                          | Occupational asthma                                      |
| 173d.                          | Work aggravated asthma                                   |
| 1780                           | Aspirin induced asthma                                   |
| 102..                          | Asthma confirmed                                         |
| 21262                          | Asthma resolved                                          |
| 212G.                          | Asthma resolved                                          |
| H3120                          | Chronic asthmatic bronchitis                             |
| H33..                          | Asthma                                                   |
| H330.                          | Extrinsic (atopic) asthma                                |
| H3300                          | Extrinsic asthma without status asthmaticus              |
| H3301                          | Extrinsic asthma with status asthmaticus                 |
| H330z                          | Extrinsic asthma NOS                                     |
| H331.                          | Intrinsic asthma                                         |
| H3310                          | Intrinsic asthma without status asthmaticus              |
| H3311                          | Intrinsic asthma with status asthmaticus                 |
| H331z                          | Intrinsic asthma NOS                                     |
| H332.                          | Mixed asthma                                             |
| H333.                          | Acute exacerbation of asthma                             |
| H334.                          | Brittle asthma                                           |
| H335.                          | Chronic asthma with fixed airflow obstruction            |
| H33z.                          | Asthma unspecified                                       |
| H33z0                          | Status asthmaticus NOS                                   |
| H33z1                          | Asthma attack                                            |
| H33z2                          | Late-onset asthma                                        |
| H33zz                          | Asthma NOS                                               |
| <b>Bowel cancer</b>            |                                                          |
| B13..                          | Malignant neoplasm of colon                              |
| B130.                          | Malignant neoplasm of hepatic flexure of colon           |
| B131.                          | Malignant neoplasm of transverse colon                   |
| B132.                          | Malignant neoplasm of descending colon                   |
| B133.                          | Malignant neoplasm of sigmoid colon                      |
| B134.                          | Malignant neoplasm of caecum                             |
| B135.                          | Malignant neoplasm of appendix                           |
| B136.                          | Malignant neoplasm of ascending colon                    |
| B137.                          | Malignant neoplasm of splenic flexure of colon           |
| B139.                          | Hereditary nonpolyposis colon cancer                     |
| B13z.                          | Malignant neoplasm of colon NOS                          |
| B1z0.                          | Malignant neoplasm of intestinal tract, part unspecified |
| <b>Breast cancer</b>           |                                                          |
| B3251                          | Malignant melanoma of breast                             |



|       |                                                       |
|-------|-------------------------------------------------------|
| B3351 | Malignant neoplasm of skin of chest, excluding breast |
| B3352 | Malignant neoplasm of skin of breast                  |
| B34.. | Malignant neoplasm of female breast                   |
| B3401 | Malignant neoplasm of areola of female breast         |
| B34y. | Malignant neoplasm of other site of female breast     |
| B34yz | Malignant neoplasm of other site of female breast NOS |
| B34z. | Malignant neoplasm of female breast NOS               |
| B35.. | Malignant neoplasm of male breast                     |
| B58y0 | Secondary malignant neoplasm of breast                |
| B830. | Carcinoma in situ of breast                           |
| BB94. | [M]Juvenile breast carcinoma                          |
| Byu6. | [X]Malignant neoplasm of breast                       |
| ZV103 | [V]Personal history of malignant neoplasm of breast   |

**Chronic obstructive pulmonary disease**

|       |                                                           |
|-------|-----------------------------------------------------------|
| 14B3. | History of chronic obstructive pulmonary disease          |
| H3... | Chronic obstructive pulmonary disease                     |
| H31.. | Chronic bronchitis                                        |
| H310. | Simple chronic bronchitis                                 |
| H3100 | Chronic catarrhal bronchitis                              |
| H310z | Simple chronic bronchitis NOS                             |
| H311. | Mucopurulent chronic bronchitis                           |
| H3110 | Purulent chronic bronchitis                               |
| H3111 | Fetid chronic bronchitis                                  |
| H311z | Mucopurulent chronic bronchitis NOS                       |
| H312. | Obstructive chronic bronchitis                            |
| H3120 | Chronic asthmatic bronchitis                              |
| H3121 | Emphysematous bronchitis                                  |
| H3122 | Acute exacerbation of chronic obstructive airways disease |
| H3123 | Bronchiolitis obliterans                                  |
| H312z | Obstructive chronic bronchitis NOS                        |
| H313. | Mixed simple and mucopurulent chronic bronchitis          |
| H31y. | Other chronic bronchitis                                  |
| H31y1 | Chronic tracheobronchitis                                 |
| H31yz | Other chronic bronchitis NOS                              |
| H31z. | Chronic bronchitis NOS                                    |
| H32.. | Emphysema                                                 |
| H320. | Chronic bullous emphysema                                 |
| H3200 | Segmental bullous emphysema                               |
| H3201 | Zonal bullous emphysema                                   |
| H3202 | Giant bullous emphysema                                   |
| H3203 | Bullous emphysema with collapse                           |
| H320z | Chronic bullous emphysema NOS                             |
| H321. | Panlobular emphysema                                      |
| H322. | Centrilobular emphysema                                   |
| H32y. | Other emphysema                                           |
| H32y0 | Acute vesicular emphysema                                 |
| H32y1 | Atrophic (senile) emphysema                               |
| H32y2 | MacLeod's unilateral emphysema                            |

|       |                                                                       |
|-------|-----------------------------------------------------------------------|
| H32yz | Other emphysema NOS                                                   |
| H32z. | Emphysema NOS                                                         |
| H36.. | Mild chronic obstructive pulmonary disease                            |
| H37.. | Moderate chronic obstructive pulmonary disease                        |
| H38.. | Severe chronic obstructive pulmonary disease                          |
| H39.. | Very severe chronic obstructive pulmonary disease                     |
| H3A.. | End stage chronic obstructive airways disease                         |
| H3y.. | Other specified chronic obstructive airways disease                   |
| H3y0. | Chronic obstruct pulmonary dis with acute lower respiratory infection |
| H3y1. | Chronic obstruct pulmonary dis with acute exacerbation, unspecified   |
| H3z.. | Chronic obstructive airways disease NOS                               |
| H4640 | Chronic emphysema due to chemical fumes                               |
| H4641 | Obliterative bronchiolitis due to chemical fumes                      |
| H5832 | Eosinophilic bronchitis                                               |
| Hyu30 | [X]Other emphysema                                                    |
| Hyu31 | [X]Other specified chronic obstructive pulmonary disease              |

### Dementia

|       |                                                               |
|-------|---------------------------------------------------------------|
| 1461  | H/O: dementia                                                 |
| 66h.. | Dementia monitoring                                           |
| 6AB.. | Dementia annual review                                        |
| 8CMZ. | Dementia care plan                                            |
| 9hD.. | Exception reporting: dementia quality indicators              |
| 9hD0. | Excepted from dementia quality indicators: Patient unsuitable |
| 9hD1. | Excepted from dementia quality indicators: Informed dissent   |
| 9Ou.. | Dementia monitoring administration                            |
| 9Ou1. | Dementia monitoring first letter                              |
| 9Ou2. | Dementia monitoring second letter                             |
| 9Ou3. | Dementia monitoring third letter                              |
| 9Ou4. | Dementia monitoring verbal invite                             |
| 9Ou5. | Dementia monitoring telephone invite                          |
| E00.. | Senile and presenile organic psychotic conditions             |
| E000. | Uncomplicated senile dementia                                 |
| E001. | Presenile dementia                                            |
| E0010 | Uncomplicated presenile dementia                              |
| E0011 | Presenile dementia with delirium                              |
| E0012 | Presenile dementia with paranoia                              |
| E0013 | Presenile dementia with depression                            |
| E001z | Presenile dementia NOS                                        |
| E002. | Senile dementia with depressive or paranoid features          |
| E0020 | Senile dementia with paranoia                                 |
| E0021 | Senile dementia with depression                               |
| E002z | Senile dementia with depressive or paranoid features NOS      |
| E003. | Senile dementia with delirium                                 |
| E004. | Arteriosclerotic dementia                                     |
| E0040 | Uncomplicated arteriosclerotic dementia                       |
| E0041 | Arteriosclerotic dementia with delirium                       |
| E0042 | Arteriosclerotic dementia with paranoia                       |

|                   |                                                              |
|-------------------|--------------------------------------------------------------|
| E0043             | Arteriosclerotic dementia with depression                    |
| E004z             | Arteriosclerotic dementia NOS                                |
| E00y.             | Other senile and presenile organic psychoses                 |
| E00z.             | Senile or presenile psychoses NOS                            |
| E041.             | Dementia in conditions EC                                    |
| Eu00.             | [X]Dementia in Alzheimer's disease                           |
| Eu000             | [X]Dementia in Alzheimer's disease with early onset          |
| Eu001             | [X]Dementia in Alzheimer's disease with late onset           |
| Eu002             | [X]Dementia in Alzheimer's dis, atypical or mixed type       |
| Eu00z             | [X]Dementia in Alzheimer's disease, unspecified              |
| Eu01.             | [X]Vascular dementia                                         |
| Eu010             | [X]Vascular dementia of acute onset                          |
| Eu011             | [X]Multi-infarct dementia                                    |
| Eu012             | [X]Subcortical vascular dementia                             |
| Eu013             | [X]Mixed cortical and subcortical vascular dementia          |
| Eu01y             | [X]Other vascular dementia                                   |
| Eu01z             | [X]Vascular dementia, unspecified                            |
| Eu02z             | [X] Unspecified dementia                                     |
| Eu041             | [X]Delirium superimposed on dementia                         |
| F110.             | Alzheimer's disease                                          |
| F1100             | Alzheimer's disease with early onset                         |
| F1101             | Alzheimer's disease with late onset                          |
| Fyu30             | [X]Other Alzheimer's disease                                 |
| ZS7C5             | Language disorder of dementia                                |
| <b>Depression</b> |                                                              |
| 1465              | H/O: depression                                              |
| 212S.             | Depression resolved                                          |
| 8BK0.             | Depression management programme                              |
| 8CAa.             | Patient given advice about management of depression          |
| 8HHq.             | Referral for guided self-help for depression                 |
| 9H90.             | Depression annual review                                     |
| 9H91.             | Depression medication review                                 |
| 9H92.             | Depression interim review                                    |
| 9HA0.             | On depression register                                       |
| 9k4..             | Depression - enhanced services administration                |
| 9k40.             | Depression - enhanced service completed                      |
| 9kQ..             | On full dose long term treatment depression - enh serv admin |
| 9Ov..             | Depression monitoring administration                         |
| 9Ov0.             | Depression monitoring first letter                           |
| 9Ov1.             | Depression monitoring second letter                          |
| 9Ov2.             | Depression monitoring third letter                           |
| 9Ov3.             | Depression monitoring verbal invite                          |
| 9Ov4.             | Depression monitoring telephone invite                       |
| E0013             | Presenile dementia with depression                           |
| E0021             | Senile dementia with depression                              |
| E0043             | Arteriosclerotic dementia with depression                    |
| E112.             | Single major depressive episode                              |
| E1120             | Single major depressive episode, unspecified                 |

|       |                                                              |
|-------|--------------------------------------------------------------|
| E1121 | Single major depressive episode, mild                        |
| E1122 | Single major depressive episode, moderate                    |
| E1123 | Single major depressive episode, severe, without psychosis   |
| E1124 | Single major depressive episode, severe, with psychosis      |
| E1125 | Single major depressive episode, partial or unspec remission |
| E1126 | Single major depressive episode, in full remission           |
| E112z | Single major depressive episode NOS                          |
| E113. | Recurrent major depressive episode                           |
| E1130 | Recurrent major depressive episodes, unspecified             |
| E1131 | Recurrent major depressive episodes, mild                    |
| E1132 | Recurrent major depressive episodes, moderate                |
| E1133 | Recurrent major depressive episodes, severe, no psychosis    |
| E1134 | Recurrent major depressive episodes, severe, with psychosis  |
| E1135 | Recurrent major depressive episodes,partial/unspec remission |
| E1136 | Recurrent major depressive episodes, in full remission       |
| E1137 | Recurrent depression                                         |
| E113z | Recurrent major depressive episode NOS                       |
| E118. | Seasonal affective disorder                                  |
| E11y2 | Atypical depressive disorder                                 |
| E11z2 | Masked depression                                            |
| E130. | Reactive depressive psychosis                                |
| E135. | Agitated depression                                          |
| E2003 | Anxiety with depression                                      |
| E291. | Prolonged depressive reaction                                |
| E2B.. | Depressive disorder NEC                                      |
| E2B1. | Chronic depression                                           |
| Eu204 | [X]Post-schizophrenic depression                             |
| Eu251 | [X]Schizoaffective disorder, depressive type                 |
| Eu32. | [X]Depressive episode                                        |
| Eu320 | [X]Mild depressive episode                                   |
| Eu321 | [X]Moderate depressive episode                               |
| Eu322 | [X]Severe depressive episode without psychotic symptoms      |
| Eu323 | [X]Severe depressive episode with psychotic symptoms         |
| Eu324 | [X]Mild depression                                           |
| Eu325 | [X]Major depression, mild                                    |
| Eu326 | [X]Major depression, moderately severe                       |
| Eu327 | [X]Major depression, severe without psychotic symptoms       |
| Eu328 | [X]Major depression, severe with psychotic symptoms          |
| Eu329 | [X]Single major depr ep, severe with psych, psych in remiss  |
| Eu32A | [X]Recurr major depr ep, severe with psych, psych in remiss  |
| Eu32y | [X]Other depressive episodes                                 |
| Eu32z | [X]Depressive episode, unspecified                           |
| Eu33. | [X]Recurrent depressive disorder                             |
| Eu330 | [X]Recurrent depressive disorder, current episode mild       |
| Eu331 | [X]Recurrent depressive disorder, current episode moderate   |
| Eu332 | [X]Recurr depress disorder cur epi severe without psyc sympt |
| Eu333 | [X]Recurrent depress disorder cur epi severe with psyc symp  |
| Eu334 | [X]Recurrent depressive disorder, currently in remission     |

|                 |                                                            |
|-----------------|------------------------------------------------------------|
| Eu33y           | [X]Other recurrent depressive disorders                    |
| Eu33z           | [X]Recurrent depressive disorder, unspecified              |
| Eu341           | [X]Dysthymia                                               |
| Eu412           | [X]Mixed anxiety and depressive disorder                   |
| <b>Diabetes</b> |                                                            |
| C108.           | Type 1 diabetes mellitus                                   |
| C1080           | Type 1 diabetes mellitus with renal complications          |
| C1082           | Type 1 diabetes mellitus with neurological complications   |
| C1084           | Unstable type 1 diabetes mellitus                          |
| C1085           | Type 1 diabetes mellitus with ulcer                        |
| C1087           | Type 1 diabetes mellitus with retinopathy                  |
| C1088           | Type 1 diabetes mellitus - poor control                    |
| C1089           | Type 1 diabetes mellitus maturity onset                    |
| C108A           | Type 1 diabetes mellitus without complication              |
| C108D           | Type 1 diabetes mellitus with nephropathy                  |
| C108E           | Type 1 diabetes mellitus with hypoglycaemic coma           |
| C108F           | Type 1 diabetes mellitus with diabetic cataract            |
| C108H           | Type 1 diabetes mellitus with arthropathy                  |
| C108J           | Type 1 diabetes mellitus with neuropathic arthropathy      |
| C109.           | Type 2 diabetes mellitus                                   |
| C1090           | Type 2 diabetes mellitus with renal complications          |
| C1091           | Type 2 diabetes mellitus with ophthalmic complications     |
| C1092           | Type 2 diabetes mellitus with neurological complications   |
| C1094           | Type 2 diabetes mellitus with ulcer                        |
| C1095           | Type 2 diabetes mellitus with gangrene                     |
| C1096           | Type 2 diabetes mellitus with retinopathy                  |
| C1097           | Type 2 diabetes mellitus - poor control                    |
| C109A           | Type 2 diabetes mellitus with mononeuropathy               |
| C109B           | Type 2 diabetes mellitus with polyneuropathy               |
| C109C           | Type 2 diabetes mellitus with nephropathy                  |
| C109D           | Type 2 diabetes mellitus with hypoglycaemic coma           |
| C109E           | Type 2 diabetes mellitus with diabetic cataract            |
| C109F           | Type 2 diabetes mellitus with peripheral angiopathy        |
| C109G           | Type 2 diabetes mellitus with arthropathy                  |
| C109H           | Type 2 diabetes mellitus with neuropathic arthropathy      |
| C109J           | Insulin treated Type 2 diabetes mellitus                   |
| C109K           | Hyperosmolar non-ketotic state in type 2 diabetes mellitus |
| C10E.           | Type 1 diabetes mellitus                                   |
| C10E0           | Type 1 diabetes mellitus with renal complications          |
| C10E1           | Type 1 diabetes mellitus with ophthalmic complications     |
| C10E2           | Type 1 diabetes mellitus with neurological complications   |
| C10E3           | Type 1 diabetes mellitus with multiple complications       |
| C10E4           | Unstable type 1 diabetes mellitus                          |
| C10E5           | Type 1 diabetes mellitus with ulcer                        |
| C10E6           | Type 1 diabetes mellitus with gangrene                     |
| C10E7           | Type 1 diabetes mellitus with retinopathy                  |
| C10E8           | Type 1 diabetes mellitus - poor control                    |
| C10E9           | Type 1 diabetes mellitus maturity onset                    |

|       |                                                            |
|-------|------------------------------------------------------------|
| C10EA | Type 1 diabetes mellitus without complication              |
| C10EB | Type 1 diabetes mellitus with mononeuropathy               |
| C10EC | Type 1 diabetes mellitus with polyneuropathy               |
| C10ED | Type 1 diabetes mellitus with nephropathy                  |
| C10EE | Type 1 diabetes mellitus with hypoglycaemic coma           |
| C10EF | Type 1 diabetes mellitus with diabetic cataract            |
| C10EG | Type 1 diabetes mellitus with peripheral angiopathy        |
| C10EH | Type 1 diabetes mellitus with arthropathy                  |
| C10EJ | Type 1 diabetes mellitus with neuropathic arthropathy      |
| C10EK | Type 1 diabetes mellitus with persistent proteinuria       |
| C10EL | Type 1 diabetes mellitus with persistent microalbuminuria  |
| C10EM | Type 1 diabetes mellitus with ketoacidosis                 |
| C10EN | Type 1 diabetes mellitus with ketoacidotic coma            |
| C10EP | Type 1 diabetes mellitus with exudative maculopathy        |
| C10EQ | Type 1 diabetes mellitus with gastroparesis                |
| C10F. | Type 2 diabetes mellitus                                   |
| C10F0 | Type 2 diabetes mellitus with renal complications          |
| C10F1 | Type 2 diabetes mellitus with ophthalmic complications     |
| C10F2 | Type 2 diabetes mellitus with neurological complications   |
| C10F3 | Type 2 diabetes mellitus with multiple complications       |
| C10F4 | Type 2 diabetes mellitus with ulcer                        |
| C10F5 | Type 2 diabetes mellitus with gangrene                     |
| C10F6 | Type 2 diabetes mellitus with retinopathy                  |
| C10F7 | Type 2 diabetes mellitus - poor control                    |
| C10F9 | Type 2 diabetes mellitus without complication              |
| C10FA | Type 2 diabetes mellitus with mononeuropathy               |
| C10FB | Type 2 diabetes mellitus with polyneuropathy               |
| C10FC | Type 2 diabetes mellitus with nephropathy                  |
| C10FD | Type 2 diabetes mellitus with hypoglycaemic coma           |
| C10FE | Type 2 diabetes mellitus with diabetic cataract            |
| C10FF | Type 2 diabetes mellitus with peripheral angiopathy        |
| C10FG | Type 2 diabetes mellitus with arthropathy                  |
| C10FH | Type 2 diabetes mellitus with neuropathic arthropathy      |
| C10FJ | Insulin treated Type 2 diabetes mellitus                   |
| C10FK | Hyperosmolar non-ketotic state in type 2 diabetes mellitus |
| C10FL | Type 2 diabetes mellitus with persistent proteinuria       |
| C10FM | Type 2 diabetes mellitus with persistent microalbuminuria  |
| C10FN | Type 2 diabetes mellitus with ketoacidosis                 |
| C10FP | Type 2 diabetes mellitus with ketoacidotic coma            |
| C10FQ | Type 2 diabetes mellitus with exudative maculopathy        |
| C10FR | Type 2 diabetes mellitus with gastroparesis                |

#### Hypertension

|       |                                                 |
|-------|-------------------------------------------------|
| 14A2. | H/O: hypertension                               |
| 21261 | Hypertension resolved                           |
| 212K. | Hypertension resolved                           |
| 61462 | Hypertension induced by oral contraceptive pill |
| 6624  | Borderline hypertension: yearly observation     |
| 6627  | Good hypertension control                       |

|       |                                                             |
|-------|-------------------------------------------------------------|
| 6628  | Poor hypertension control                                   |
| 662b. | Moderate hypertension control                               |
| 662c. | Hypertension six month review                               |
| 662d. | Hypertension annual review                                  |
| 662F. | Hypertension treatment. started                             |
| 662G. | Hypertensive treatment changed                              |
| 662O. | On treatment for hypertension                               |
| 662r. | Trial withdrawal of antihypertensive therapy                |
| 7Q01. | High cost hypertension drugs                                |
| 8B26. | Antihypertensive therapy                                    |
| 8BL0. | Patient on maximal tolerated antihypertensive therapy       |
| 8I3N. | Hypertension treatment refused                              |
| 9OI9. | Hypertension monitor deleted                                |
| F4042 | Blind hypertensive eye                                      |
| F4213 | Hypertensive retinopathy                                    |
| G2... | Hypertensive disease                                        |
| G20.. | Essential hypertension                                      |
| G200. | Malignant essential hypertension                            |
| G201. | Benign essential hypertension                               |
| G202. | Systolic hypertension                                       |
| G203. | Diastolic hypertension                                      |
| G20z. | Essential hypertension NOS                                  |
| G21.. | Hypertensive heart disease                                  |
| G210. | Malignant hypertensive heart disease                        |
| G2100 | Malignant hypertensive heart disease without CCF            |
| G2101 | Malignant hypertensive heart disease with CCF               |
| G211. | Benign hypertensive heart disease                           |
| G2110 | Benign hypertensive heart disease without CCF               |
| G2111 | Benign hypertensive heart disease with CCF                  |
| G21z. | Hypertensive heart disease NOS                              |
| G21z0 | Hypertensive heart disease NOS without CCF                  |
| G21z1 | Hypertensive heart disease NOS with CCF                     |
| G21zz | Hypertensive heart disease NOS                              |
| G22.. | Hypertensive renal disease                                  |
| G220. | Malignant hypertensive renal disease                        |
| G221. | Benign hypertensive renal disease                           |
| G222. | Hypertensive renal disease with renal failure               |
| G22z. | Hypertensive renal disease NOS                              |
| G23.. | Hypertensive heart and renal disease                        |
| G230. | Malignant hypertensive heart and renal disease              |
| G231. | Benign hypertensive heart and renal disease                 |
| G232. | Hypertensive heart&renal dis wth (congestive) heart failure |
| G233. | Hypertensive heart and renal disease with renal failure     |
| G234. | Hyperten heart&renal dis+both(congestv)heart and renal fail |
| G23z. | Hypertensive heart and renal disease NOS                    |
| G24.. | Secondary hypertension                                      |
| G240. | Secondary malignant hypertension                            |
| G2400 | Secondary malignant renovascular hypertension               |

|       |                                                              |
|-------|--------------------------------------------------------------|
| G240z | Secondary malignant hypertension NOS                         |
| G241. | Secondary benign hypertension                                |
| G2410 | Secondary benign renovascular hypertension                   |
| G241z | Secondary benign hypertension NOS                            |
| G244. | Hypertension secondary to endocrine disorders                |
| G24z. | Secondary hypertension NOS                                   |
| G24z0 | Secondary renovascular hypertension NOS                      |
| G24z1 | Hypertension secondary to drug                               |
| G24zz | Secondary hypertension NOS                                   |
| G2y.. | Other specified hypertensive disease                         |
| G2z.. | Hypertensive disease NOS                                     |
| G672. | Hypertensive encephalopathy                                  |
| Gyu2. | [X]Hypertensive diseases                                     |
| Gyu21 | [X]Hypertension secondary to other renal disorders           |
| L122. | Other pre-existing hypertension in preg/childbirth/puerp     |
| L1220 | Other pre-existing hypertension in preg/childb/puerp unspec  |
| L1221 | Other pre-existing hypertension in preg/childb/puerp - deliv |
| L1223 | Other pre-exist hypertension in preg/childb/puerp-not deliv  |
| L122z | Other pre-existing hypertension in preg/childb/puerp NOS     |
| L127. | Pre-eclampsia or eclampsia with pre-existing hypertension    |
| L127z | Pre-eclampsia or eclampsia + pre-existing hypertension NOS   |
| L128. | Pre-exist hypertension compl preg childbirth and puerperium  |
| L1280 | Pre-exist hyperten heart dis compl preg childbth+puerperium  |
| L1282 | Pre-exist 2ndry hypertens comp preg childbth and puerperium  |
| TJC7. | Adverse reaction to other antihypertensives                  |
| TJC7z | Adverse reaction to antihypertensives NOS                    |
| U60C5 | [X]Oth antihyperten drug caus advers eff in therap use, NEC  |

#### Ischaemic heart disease

|       |                                                      |
|-------|------------------------------------------------------|
| G3... | Ischaemic heart disease                              |
| G30.. | Acute myocardial infarction                          |
| G300. | Acute anterolateral infarction                       |
| G301. | Other specified anterior myocardial infarction       |
| G301z | Anterior myocardial infarction NOS                   |
| G302. | Acute inferolateral infarction                       |
| G303. | Acute inferoposterior infarction                     |
| G304. | Posterior myocardial infarction NOS                  |
| G305. | Lateral myocardial infarction NOS                    |
| G307. | Acute subendocardial infarction                      |
| G3070 | Acute non-Q wave infarction                          |
| G3071 | Acute non-ST segment elevation myocardial infarction |
| G308. | Inferior myocardial infarction NOS                   |
| G309. | Acute Q-wave infarct                                 |
| G30A. | Mural thrombosis                                     |
| G30X0 | Acute ST segment elevation myocardial infarction     |
| G30yz | Other acute myocardial infarction NOS                |
| G30z. | Acute myocardial infarction NOS                      |
| G31.. | Other acute and subacute ischaemic heart disease     |
| G310. | Postmyocardial infarction syndrome                   |



|                       |                                                                                                                         |
|-----------------------|-------------------------------------------------------------------------------------------------------------------------|
| G311.                 | Preinfarction syndrome                                                                                                  |
| G3110                 | Myocardial infarction aborted                                                                                           |
| G3111                 | Unstable angina                                                                                                         |
| G3112                 | Angina at rest                                                                                                          |
| G3114                 | Worsening angina                                                                                                        |
| G3115                 | Acute coronary syndrome                                                                                                 |
| G31y0                 | Acute coronary insufficiency                                                                                            |
| G31yz                 | Other acute and subacute ischaemic heart disease NOS                                                                    |
| G32..                 | Old myocardial infarction                                                                                               |
| G33..                 | Angina pectoris                                                                                                         |
| G3300                 | Nocturnal angina                                                                                                        |
| G330z                 | Angina decubitus NOS                                                                                                    |
| G331.                 | Prinzmetal's angina                                                                                                     |
| G332.                 | Coronary artery spasm                                                                                                   |
| G33z.                 | Angina pectoris NOS                                                                                                     |
| G33z3                 | Angina on effort                                                                                                        |
| G33z4                 | Ischaemic chest pain                                                                                                    |
| G33z6                 | New onset angina                                                                                                        |
| G33z7                 | Stable angina                                                                                                           |
| G33zz                 | Angina pectoris NOS                                                                                                     |
| G340.                 | Coronary atherosclerosis                                                                                                |
| G3400                 | Single coronary vessel disease                                                                                          |
| G3401                 | Double coronary vessel disease                                                                                          |
| G341.                 | Aneurysm of heart                                                                                                       |
| G3410                 | Ventricular cardiac aneurysm                                                                                            |
| G342.                 | Atherosclerotic cardiovascular disease                                                                                  |
| G343.                 | Ischaemic cardiomyopathy                                                                                                |
| G34z.                 | Other chronic ischaemic heart disease NOS                                                                               |
| G34z0                 | Asymptomatic coronary heart disease                                                                                     |
| G35..                 | Subsequent myocardial infarction                                                                                        |
| G366.                 | Thrombosis of atrium, auricular appendage, and ventricle as current complications following acute myocardial infarction |
| G37..                 | Cardiac syndrome X                                                                                                      |
| G38..                 | Postoperative myocardial infarction                                                                                     |
| G39..                 | Coronary microvascular disease                                                                                          |
| G3z..                 | Ischaemic heart disease NOS                                                                                             |
| <b>Lung cancer</b>    |                                                                                                                         |
| B22..                 | Malignant neoplasm of trachea, bronchus and lung                                                                        |
| B2211                 | Malignant neoplasm of hilus of lung                                                                                     |
| B222.                 | Malignant neoplasm of upper lobe, bronchus or lung                                                                      |
| B2221                 | Malignant neoplasm of upper lobe of lung                                                                                |
| B2231                 | Malignant neoplasm of middle lobe of lung                                                                               |
| B224.                 | Malignant neoplasm of lower lobe, bronchus or lung                                                                      |
| B2241                 | Malignant neoplasm of lower lobe of lung                                                                                |
| B22z.                 | Malignant neoplasm of bronchus or lung NOS                                                                              |
| B570.                 | Secondary malignant neoplasm of lung                                                                                    |
| <b>Osteoarthritis</b> |                                                                                                                         |
| 14G2.                 | H/O: osteoarthritis                                                                                                     |

|       |                                                              |
|-------|--------------------------------------------------------------|
| 2G26. | O/E - hands - Heberden's nodes                               |
| 7P204 | Delivery of rehabilitation for osteoarthritis                |
| N05.. | Osteoarthritis and allied disorders                          |
| N050. | Generalised osteoarthritis - OA                              |
| N0500 | Generalised osteoarthritis of unspecified site               |
| N0501 | Generalised osteoarthritis of the hand                       |
| N0502 | Generalised osteoarthritis of multiple sites                 |
| N0503 | Bouchard's nodes with arthropathy                            |
| N0504 | Primary generalized osteoarthrosis                           |
| N0505 | Secondary multiple arthrosis                                 |
| N0506 | Erosive osteoarthrosis                                       |
| N0507 | Heberden's nodes with arthropathy                            |
| N050z | Generalised osteoarthritis NOS                               |
| N051. | Localised, primary osteoarthritis                            |
| N0510 | Localised, primary osteoarthritis of unspecified site        |
| N0511 | Localised, primary osteoarthritis of the shoulder region     |
| N0512 | Localised, primary osteoarthritis of the upper arm           |
| N0513 | Localised, primary osteoarthritis of the forearm             |
| N0514 | Localised, primary osteoarthritis of the hand                |
| N0515 | Localised, primary osteoarthritis of the pelvic region/thigh |
| N0516 | Localised, primary osteoarthritis of the lower leg           |
| N0517 | Localised, primary osteoarthritis of the ankle and foot      |
| N0518 | Localised, primary osteoarthritis of other specified site    |
| N0519 | Primary coxarthrosis, bilateral                              |
| N051A | Coxarthrosis resulting from dysplasia, bilateral             |
| N051B | Primary gonarthrosis, bilateral                              |
| N051C | Primary arthrosis of first carpometacarpal joints, bilateral |
| N051D | Localised, primary osteoarthritis of the wrist               |
| N051E | Localised, primary osteoarthritis of toe                     |
| N051F | Localised, primary osteoarthritis of elbow                   |
| N051G | Osteoarthritis of spinal facet joint                         |
| N051z | Localised, primary osteoarthritis NOS                        |
| N052. | Localised, secondary osteoarthritis                          |
| N0520 | Localised, secondary osteoarthritis of unspecified site      |
| N0521 | Localised, secondary osteoarthritis of the shoulder region   |
| N0522 | Localised, secondary osteoarthritis of the upper arm         |
| N0523 | Localised, secondary osteoarthritis of the forearm           |
| N0524 | Localised, secondary osteoarthritis of the hand              |
| N0525 | Localised, secondary osteoarthritis of pelvic region/thigh   |
| N0526 | Localised, secondary osteoarthritis of the lower leg         |
| N0527 | Localised, secondary osteoarthritis of the ankle and foot    |
| N0528 | Localised, secondary osteoarthritis of other specified site  |
| N052z | Localised, secondary osteoarthritis NOS                      |
| N053. | Localised osteoarthritis, unspecified                        |
| N0530 | Localised osteoarthritis, unspecified, of unspecified site   |
| N0531 | Localised osteoarthritis, unspecified, of shoulder region    |
| N0532 | Localised osteoarthritis, unspecified, of the upper arm      |
| N0533 | Localised osteoarthritis, unspecified, of the forearm        |

|       |                                                              |
|-------|--------------------------------------------------------------|
| N0534 | Localised osteoarthritis, unspecified, of the hand           |
| N0535 | Localised osteoarthritis, unspecified, pelvic region/thigh   |
| N0536 | Localised osteoarthritis, unspecified, of the lower leg      |
| N0537 | Localised osteoarthritis, unspecified, of the ankle and foot |
| N0538 | Localised osteoarthritis, unspecified, of other spec site    |
| N0539 | Arthrosis of first carpometacarpal joint, unspecified        |
| N053z | Localised osteoarthritis, unspecified, NOS                   |
| N054. | Oligoarticular osteoarthritis, unspecified                   |
| N0540 | Oligoarticular osteoarthritis, unspec, of unspecified sites  |
| N0541 | Oligoarticular osteoarthritis, unspecified, of shoulder      |
| N0542 | Oligoarticular osteoarthritis, unspecified, of upper arm     |
| N0544 | Oligoarticular osteoarthritis, unspecified, of hand          |
| N0545 | Oligoarticular osteoarthritis, unspecified, of pelvis/thigh  |
| N0546 | Oligoarticular osteoarthritis, unspecified, of lower leg     |
| N0547 | Oligoarticular osteoarthritis, unspecified, of ankle/foot    |
| N0548 | Oligoarticular osteoarthritis, unspecified, other spec sites |
| N0549 | Oligoarticular osteoarthritis, unspecified, multiple sites   |
| N054z | Osteoarthritis of more than one site, unspecified, NOS       |
| N05z. | Osteoarthritis NOS                                           |
| N05z0 | Osteoarthritis NOS, of unspecified site                      |
| N05z1 | Osteoarthritis NOS, of shoulder region                       |
| N05z4 | Osteoarthritis NOS, of the hand                              |
| N05z5 | Osteoarthritis NOS, pelvic region/thigh                      |
| N05z6 | Osteoarthritis NOS, of the lower leg                         |
| N05z7 | Osteoarthritis NOS, of ankle and foot                        |
| N05z8 | Osteoarthritis NOS, other specified site                     |
| N05z9 | Osteoarthritis NOS, of shoulder                              |
| N05zA | Osteoarthritis NOS, of sternoclavicular joint                |
| N05zB | Osteoarthritis NOS, of acromioclavicular joint               |
| N05zC | Osteoarthritis NOS, of elbow                                 |
| N05zD | Osteoarthritis NOS, of distal radio-ulnar joint              |
| N05zE | Osteoarthritis NOS, of wrist                                 |
| N05zF | Osteoarthritis NOS, of MCP joint                             |
| N05zG | Osteoarthritis NOS, of PIP joint of finger                   |
| N05zH | Osteoarthritis NOS, of DIP joint of finger                   |
| N05zJ | Osteoarthritis NOS, of hip                                   |
| N05zK | Osteoarthritis NOS, of sacro-iliac joint                     |
| N05zL | Osteoarthritis NOS, of knee                                  |
| N05zM | Osteoarthritis NOS, of tibio-fibular joint                   |
| N05zN | Osteoarthritis NOS, of ankle                                 |
| N05zP | Osteoarthritis NOS, of subtalar joint                        |
| N05zQ | Osteoarthritis NOS, of talonavicular joint                   |
| N05zR | Osteoarthritis NOS, of other tarsal joint                    |
| N05zS | Osteoarthritis NOS, of 1st MTP joint                         |
| N05zT | Osteoarthritis NOS, of lesser MTP joint                      |
| N05zU | Osteoarthritis NOS, of IP joint of toe                       |
| N05zz | Osteoarthritis NOS                                           |
| Nyu2. | [X]Arthrosis                                                 |

|       |                                                           |
|-------|-----------------------------------------------------------|
| Nyu20 | [X]Other polyarthrosis                                    |
| Nyu21 | [X]Other primary coxarthrosis                             |
| Nyu22 | [X]Other dysplastic coxarthrosis                          |
| Nyu24 | [X]Other secondary coxarthrosis, bilateral                |
| Nyu25 | [X]Other primary gonarthrosis                             |
| Nyu27 | [X]Other secondary gonarthrosis, bilateral                |
| Nyu28 | [X]Other secondary gonarthrosis                           |
| Nyu29 | [X]Other primary arthrosis of first carpometacarpal joint |
| Nyu2D | [X]Other specified arthrosis                              |
| Nyu2E | [X]Other secondary coxarthrosis                           |

#### Prostate cancer

|       |                                                              |
|-------|--------------------------------------------------------------|
| 7B365 | Radical prostatectomy without pelvic node excision           |
| 4M01. | Gleason prostate grade 5-7 (medium)                          |
| 4M02. | Gleason prostate grade 8-10 (high)                           |
| 4M00. | Gleason prostate grade 2-4 (low)                             |
| B46.. | Malignant neoplasm of prostate                               |
| 7B360 | Radical prostatectomy - unspecified excision of pelvic nodes |
| ZV104 | [V]Personal history of malignant neoplasm of prostate        |
| 7B367 | Radical prostatectomy with pelvic lymphadenectomy            |
| 4M0.. | Gleason grading of prostate cancer                           |
| 7B200 | Radical cystoprostatectomy                                   |
| 7B366 | Radical prostatectomy with pelvic node sampling              |
| 14270 | H/O: prostate cancer                                         |
| 7B202 | Radical cystoprostatectomy                                   |

#### Rheumatoid arthritis

|       |                                                             |
|-------|-------------------------------------------------------------|
| 14G1. | H/O: rheumatoid arthritis                                   |
| 2G25. | O/E - hands - ulnar deviation                               |
| 2G27. | O/E-hands-rheumatoid spindling                              |
| 66H.. | Rheumatoid arthrit. monitoring                              |
| 7P203 | Delivery of rehabilitation for rheumatoid arthritis         |
| 9mM.. | Rheumatoid arthritis monitoring invitation                  |
| 9mM0. | Rheumatoid arthritis monitoring invitation first letter     |
| 9mM1. | Rheumatoid arthritis monitoring invitation second letter    |
| 9mM2. | Rheumatoid arthritis monitoring invitation third letter     |
| 9mM3. | Rheumatoid arthritis monitoring verbal invitation           |
| 9mM4. | Rheumatoid arthritis monitoring telephone invitation        |
| F3712 | Polyneuropathy in rheumatoid arthritis                      |
| F3964 | Myopathy due to rheumatoid arthritis                        |
| G5y8. | Rheumatoid myocarditis                                      |
| G5yA. | Rheumatoid carditis                                         |
| H570. | Rheumatoid lung                                             |
| N005. | Adult Still's Disease                                       |
| N04.. | Rheumatoid arthritis and other inflammatory polyarthropathy |
| N040. | Rheumatoid arthritis                                        |
| N0400 | Rheumatoid arthritis of cervical spine                      |
| N0401 | Other rheumatoid arthritis of spine                         |
| N0402 | Rheumatoid arthritis of shoulder                            |
| N0403 | Rheumatoid arthritis of sternoclavicular joint              |

|               |                                                              |
|---------------|--------------------------------------------------------------|
| N0404         | Rheumatoid arthritis of acromioclavicular joint              |
| N0405         | Rheumatoid arthritis of elbow                                |
| N0406         | Rheumatoid arthritis of distal radio-ulnar joint             |
| N0407         | Rheumatoid arthritis of wrist                                |
| N0408         | Rheumatoid arthritis of MCP joint                            |
| N0409         | Rheumatoid arthritis of PIP joint of finger                  |
| N040A         | Rheumatoid arthritis of DIP joint of finger                  |
| N040B         | Rheumatoid arthritis of hip                                  |
| N040C         | Rheumatoid arthritis of sacro-iliac joint                    |
| N040D         | Rheumatoid arthritis of knee                                 |
| N040E         | Rheumatoid arthritis of tibio-fibular joint                  |
| N040F         | Rheumatoid arthritis of ankle                                |
| N040G         | Rheumatoid arthritis of subtalar joint                       |
| N040H         | Rheumatoid arthritis of talonavicular joint                  |
| N040J         | Rheumatoid arthritis of other tarsal joint                   |
| N040K         | Rheumatoid arthritis of 1st MTP joint                        |
| N040L         | Rheumatoid arthritis of lesser MTP joint                     |
| N040M         | Rheumatoid arthritis of IP joint of toe                      |
| N040N         | Rheumatoid vasculitis                                        |
| N040P         | Seronegative rheumatoid arthritis                            |
| N040Q         | Rheumatoid bursitis                                          |
| N040R         | Rheumatoid nodule                                            |
| N040S         | Rheumatoid arthritis - multiple joint                        |
| N040T         | Flare of rheumatoid arthritis                                |
| N041.         | Felty's syndrome                                             |
| N042.         | Other rheumatoid arthropathy + visceral/systemic involvement |
| N0421         | Rheumatoid lung disease                                      |
| N0422         | Rheumatoid nodule                                            |
| N042z         | Rheumatoid arthropathy + visceral/systemic involvement NOS   |
| N047.         | Seropositive erosive rheumatoid arthritis                    |
| N04X.         | Seropositive rheumatoid arthritis                            |
| N04y0         | Rheumatoid lung                                              |
| N04y2         | Adult-onset Still's disease                                  |
| N3622         | Swan-neck finger deformity                                   |
| Nyu10         | [X]Rheumatoid arthritis+involvement/other organs or systems  |
| Nyu11         | [X]Other seropositive rheumatoid arthritis                   |
| Nyu12         | [X]Other specified rheumatoid arthritis                      |
| Nyu1G         | [X]Seropositive rheumatoid arthritis unspecified             |
| <b>Stroke</b> |                                                              |
| G6400         | Cerebral infarction due to thrombosis of cerebral arteries   |
| G6W..         | Cereb infarct due unsp occlus/stenos precerebr arteries      |
| Gyu63         | [X]Cerebrl infarctn due/unspcf occlusn or sten/cerebrl artr  |
| G63y0         | Cerebral infarct due to thrombosis of precerebral arteries   |
| G683.         | Sequelae of cerebral infarction                              |
| G64z3         | Right sided cerebral infarction                              |
| Gyu6G         | [X]Cereb infarct due unsp occlus/stenos precerebr arteries   |
| G640.         | Cerebral thrombosis                                          |
| G64z.         | Cerebral infarction NOS                                      |

|          |                                                                   |
|----------|-------------------------------------------------------------------|
| G641.    | Cerebral embolism                                                 |
| G63..    | Infarction - precerebral                                          |
| G64z0    | Brainstem infarction                                              |
| G6410    | Cerebral infarction due to embolism of cerebral arteries          |
| G64z4    | Infarction of basal ganglia                                       |
| G6X..    | Cerebrl infarctn due/unspcf occlusn or sten/cerebrl artr          |
| G64z1    | Wallenberg syndrome                                               |
| G64..    | Cerebral arterial occlusion                                       |
| G63y1    | Cerebral infarction due to embolism of precerebral arteries       |
| G64z2    | Left sided cerebral infarction                                    |
| Gyu64    | [X]Other cerebral infarction                                      |
| 14A7.    | H/O: CVA/stroke                                                   |
| 14AK.    | H/O: Stroke in last year                                          |
| 1M4..    | Central post-stroke pain                                          |
| 661M7    | Stroke self-management plan agreed                                |
| 661N7    | Stroke self-management plan review                                |
| 662e.    | Stroke/CVA annual review                                          |
| 662M.    | Stroke monitoring                                                 |
| 662M1    | Stroke 6 month review                                             |
| 662M2    | Stroke initial post discharge review                              |
| 7P242    | Delivery of rehabilitation for stroke                             |
| 8HHM.    | Ref to multidisciplinary stroke function improvement service      |
| 8IEC.    | Ref multidisciplinary stroke function improvement declined        |
| 9h2..    | Exception reporting: stroke quality indicators                    |
| 9h21.    | Excepted from stroke quality indicators: Patient unsuitable       |
| 9h22.    | Excepted from stroke quality indicators: Informed dissent         |
| Fyu56    | [X]Other lacunar syndromes                                        |
| G66..    | Stroke and cerebrovascular accident unspecified                   |
| G663.    | Brain stem stroke syndrome                                        |
| G664.    | Cerebellar stroke syndrome                                        |
| G665.    | Pure motor lacunar syndrome                                       |
| G666.    | Pure sensory lacunar syndrome                                     |
| G667.    | Left sided CVA                                                    |
| G668.    | Right sided CVA                                                   |
| G68X.    | Sequelae of stroke, not specified as haemorrhage or infarction    |
| Gyu6C    | [X]Sequelae of stroke, not specified as haemorrhage or infarction |
| L440.    | Stroke in the puerperium                                          |
| ZV125    | [V]Personal history of stroke                                     |
| COVID-19 |                                                                   |
| 1JX1.    | Suspected disease caused by 2019-nCoV (novel coronavirus)         |
| A7951    | Disease caused by 2019-nCoV (novel coronavirus)                   |
| 4J3R.    | 2019-nCoV (novel coronavirus) serology                            |
| 4J3R1    | 2019-nCoV (novel coronavirus) detected                            |

**Appendix F. Summary of the top 50 most cited publications using GS data. A full list of publications can be found at <https://www.ed.ac.uk/generation-scotland/what-found/publications>.**

| First Author     | Title                                                                                                                                      | Year Published | Journal                | Keywords                    | Citations |
|------------------|--------------------------------------------------------------------------------------------------------------------------------------------|----------------|------------------------|-----------------------------|-----------|
| Wray             | Genome-wide association analyses identify 44 risk variants and refine the genetic architecture of major depression.                        | 2018           | Nature Genetics        | Cognition and Mental Health | 2,243     |
| Lee              | Gene discovery and polygenic prediction from a genome-wide association study of educational attainment in 1.1 million individuals.         | 2018           | Nature Genetics        | Data                        | 1,714     |
| Howard           | Genome-wide meta-analysis of depression identifies 102 independent variants and highlights the importance of the prefrontal brain regions. | 2019           | Nature Neuroscience    | Cognition and Mental Health | 1,483     |
| Pardiñas         | Common schizophrenia alleles are enriched in mutation-intolerant genes and in regions under strong background selection.                   | 2018           | Nature Genetics        | Cognition and Mental Health | 1,376     |
| Okbay            | Genome-wide association study identifies 74 loci associated with educational attainment.                                                   | 2016           | Nature                 | Cognition and Mental Health | 1,292     |
| Anttila          | Analysis of shared heritability in common disorders of the brain.                                                                          | 2018           | Science                | Cognition and Mental Health | 1,202     |
| Pairo-Castineira | Genetic mechanisms of critical illness in Covid-19.                                                                                        | 2020           | Nature                 | COVID-19                    | 1,162     |
| UK10K Consortium | The UK10K project identifies rare variants in health and disease.                                                                          | 2015           | Nature                 | Data                        | 1,030     |
| Rahbari          | Timing, rates and spectra of human germline mutation.                                                                                      | 2015           | Nature Genetics        | Data                        | 859       |
| Lazaridis        | Genomic insights into the origin of farming in the ancient Near East.                                                                      | 2016           | Nature                 | Data                        | 850       |
| Fitzgerald       | Large-scale discovery of novel genetic causes of developmental disorders.                                                                  | 2014           | Nature                 | Cognition and Mental Health | 693       |
| Repapi           | Genome-wide association study identifies five loci associated with lung function.                                                          | 2009           | Nature Genetics        | Respiratory Disease         | 646       |
| Davies           | Study of 300,486 individuals identifies 148 independent genetic loci influencing general cognitive function.                               | 2018           | Nature Communications  | Cognition and Mental Health | 551       |
| Warren           | Genome-wide association analysis identifies novel blood pressure loci and offers biological insights into cardiovascular risk.             | 2017           | Nature genetics        | Cardiovascular Disease      | 541       |
| Roselli          | Multi-Ethnic Genome-wide Association Study for Atrial Fibrillation.                                                                        | 2018           | Nature Genetics        | Cardiovascular              | 522       |
| Grotzinger       | Genomic structural equation modelling provides insights into the multivariate genetic architecture of complex traits.                      | 2019           | Nature Human Behaviour | Methodology                 | 521       |
| Liu              | Biological and clinical insights from genomic analysis of plasma lipids in >300,000 individuals.                                           | 2017           | Nature                 | Cardiovascular Disease      | 511       |

|               |                                                                                                                                                             |      |                                     |                             |     |
|---------------|-------------------------------------------------------------------------------------------------------------------------------------------------------------|------|-------------------------------------|-----------------------------|-----|
| Wuttke        | A catalogue of genetic loci associated with kidney function from analyses of a million individuals.                                                         | 2019 | Nature Genetics                     | Kidney Disease              | 509 |
| Day           | Genomic analyses identify hundreds of variants associated with age at menarche and support a role for puberty timing in cancer risk.                        | 2017 | Nature Genetics                     | Cancer                      | 466 |
| Kwong         | Mental health before and during the COVID-19 pandemic in two longitudinal UK population cohorts.                                                            | 2020 | British Journal of Psychiatry       | COVID-19                    | 461 |
| Soler Artigas | Genome-wide association and large-scale follow-up identifies 16 new loci influencing lung function.                                                         | 2011 | Nature Genetics                     | Respiratory Disease         | 458 |
| Messner       | Ultra-high-throughput clinical proteomics reveals classifiers of COVID-19 infection.                                                                        | 2020 | Cell Systems                        | COVID-19                    | 433 |
| Bethlehem     | Brain charts for the human lifespan.                                                                                                                        | 2022 | Nature                              | Brain Charts                | 416 |
| Davies        | Genetic contributions to variation in general cognitive function: a meta-analysis of genome-wide association studies in the CHARGE consortium (N=53,949).   | 2015 | Molecular Psychiatry                | Cognition and Mental Health | 416 |
| Davies        | Genome-wide association study of cognitive functions and educational attainment in UK Biobank (N=112,151).                                                  | 2016 | Molecular Psychiatry                | Cognition and Mental Health | 370 |
| Clarke        | Genome-wide association study of alcohol consumption and genetic overlap with other health-related traits in UK Biobank (N=112,117).                        | 2017 | Molecular Psychiatry                | Alcohol                     | 368 |
| Schmidt       | PCSK9 genetic variants and risk of type 2 diabetes: a Mendelian randomisation study.                                                                        | 2016 | The Lancet Diabetes & Endocrinology | Diabetes                    | 366 |
| Day           | Large-scale genomic analyses link reproductive aging to hypothalamic signalling, breast cancer susceptibility and BRCA1-mediated DNA repair.                | 2015 | Nature Genetics                     | Cancer                      | 366 |
| Shrine        | New genetic signals for lung function highlight pathways and pleiotropy, and chronic obstructive pulmonary disease associations across multiple ancestries. | 2019 | Nature Genetics                     | Cardiovascular              | 332 |
| Luciano       | Association analysis in over 329,000 individuals identifies 116 independent variants influencing neuroticism.                                               | 2017 | Nature Genetics                     | Cognition and Mental Health | 312 |
| Turcot        | Protein-altering variants associated with body mass index implicate pathways that control energy intake and expenditure in obesity.                         | 2017 | Nature Genetics                     | Lifestyle                   | 300 |
| Rietveld      | Common genetic variants associated with cognitive performance identified using the proxy-phenotype method.                                                  | 2014 | PNAS 2014                           | Cognition and Mental Health | 296 |



|                 |                                                                                                                                                 |      |                                |                                  |     |
|-----------------|-------------------------------------------------------------------------------------------------------------------------------------------------|------|--------------------------------|----------------------------------|-----|
| Surendran       | Trans-ancestry meta-analyses identify rare and common variants associated with blood pressure and hypertension.                                 | 2016 | Nature Genetics                | Cardiovascular Disease           | 294 |
| de Moor         | Meta-analysis of Genome-wide Association Studies for Neuroticism, and the Polygenic Association with Major Depressive Disorder.                 | 2015 | JAMA Psychiatry                | Cognition and Mental Health      | 293 |
| Christopher son | Large-scale analyses of common and rare variants identify 12 new loci associated with atrial fibrillation.                                      | 2017 | Nature Genetics                | Cardiovascular Disease           | 290 |
| Wain            | Genome-wide association analyses for lung function and chronic obstructive pulmonary disease identify new loci and potential druggable targets. | 2017 | Nature genetics                | Respiratory Disease              | 283 |
| Brown           | Vascular Consequences of Pre-eclampsia.                                                                                                         | 2015 | Journal of Hypertension Volume | Cardiovascular Disease           | 283 |
| Smith, D. J.    | Genome-wide analysis of over 106,000 individuals identifies 9 neuroticism-associated loci.                                                      | 2016 | Molecular Psychiatry           | Cognition and Mental Health      | 266 |
| Graham          | The power of genetic diversity in genome-wide association studies of lipids.                                                                    | 2021 | Nature                         | GWAS                             | 261 |
| Chen            | The Trans-Ancestral Genomic Architecture of Glycaemic Traits.                                                                                   | 2021 | Nature Genetics                | Other                            | 250 |
| Tin             | Target genes, variants, tissues and transcriptional pathways influencing human serum urate levels.                                              | 2019 | Nature Genetics                | Kidney Disease                   | 250 |
| Schumann        | KLB is associated with alcohol drinking, and its gene product $\beta$ -Klotho is necessary for FGF21 regulation of alcohol preference.          | 2016 | PNAS                           | Alcohol                          | 226 |
| Abul-Husn       | Personalized Medicine and the Power of Electronic Health Records.                                                                               | 2019 | Cell                           | Ethical, Legal and Social Issues | 218 |
| Clarke          | Common polygenic risk for autism spectrum disorder (ASD) is associated with cognitive ability in the general population.                        | 2015 | Molecular Psychiatry           | Cognition and Mental Health      | 217 |
| Wessel          | Low-frequency and rare exome chip variants associate with fasting glucose and type 2 diabetes susceptibility.                                   | 2015 | Nature Communications          | Diabetes                         | 215 |
| Welsh           | Cardiac Troponin T and Troponin I in the general population: contrasting genetic determinants and outcomes.                                     | 2019 | Circulation                    | Cardiovascular                   | 214 |
| Graff           | Genome-wide physical activity interactions in adiposity — a meta-analysis of 200,452 adults.                                                    | 2017 | PLoS Genetics                  | Obesity                          | 200 |
| Justice         | Genome-Wide Meta-Analysis of 241,258 Adults Accounting for Smoking Behaviour Identifies Novel Loci for Obesity Traits.                          | 2017 | Nature Communications          | Smoking, Obesity                 | 200 |
| Marioni         | Molecular genetic contributions to socioeconomic status and intelligence.                                                                       | 2014 | Intelligence                   | Cognition and Mental Health      | 196 |

|       |                                                                                                                                                                   |      |                       |                             |     |
|-------|-------------------------------------------------------------------------------------------------------------------------------------------------------------------|------|-----------------------|-----------------------------|-----|
| Power | Genome-wide Association for Major Depression Through Age at Onset Stratification: Major Depressive Disorder Working Group of the Psychiatric Genomics Consortium. | 2016 | Biological Psychiatry | Cognition and Mental Health | 193 |
|-------|-------------------------------------------------------------------------------------------------------------------------------------------------------------------|------|-----------------------|-----------------------------|-----|
